# Supplementary material for: Is Active Moss Biomonitoring Comparable to Air Filter Standard Sampling?
Source: MDPI journal article supplement (doi:10.3390/ijerph19084706), 2022-04-13
Supplement: s1 [file s1]

**Table S1.** Mean metal concentration in mosses before exposure (mg/kg d.m.).

|           | <b>Mn</b> | <b>Fe</b> | <b>Cu</b> | <b>Zn</b> | <b>Cd</b> | <b>Hg</b> | <b>Pb</b> |
|-----------|-----------|-----------|-----------|-----------|-----------|-----------|-----------|
| <i>Pl</i> | 212       | 173       | 7.07      | 52.2      | 0.51      | 0.031     | 6.65      |
| <i>Sp</i> | 151       | 128       | 3.59      | 30.1      | 0.53      | 0.036     | 2.97      |
| <i>Dp</i> | 168       | 306       | 8.49      | 32.8      | 0.54      | 0.049     | 7.41      |
| n         | 5         | 5         | 5         | 5         | 5         | 5         | 5         |
